# Supplementary material
Source: publisher site journal article supplement (https://www.dovepress.com/article/446584)
Supplement: Supplementary file 1 [file get_supplementary_file.php]

| **Table S1** failure mode distribution, number (percentage) of teeth | | | | | | | | |
| --- | --- | --- | --- | --- | --- | --- | --- | --- |
| **Group** | **Before aging** | | | | **After aging** | | | |
| A | CE | CF | M | A | CE | CF | M |
| **A** | 1 | - | 6 | 3 | - | - | 9 | 1 |
| **B** | 2 | 2 | 2 | 4 | 2 | 2 | 3 | 3 |
| **C** | 4 | 3 | 1 | 2 | 3 | 1 | 3 | 3 |
| **D** | 5 | 2 | - | 3 | 4 | 2 | - | 4 |
| **E** | 4 | 1 | - | 5 | 3 | 1 | 1 | 5 |
| **F** | 4 | 1 | 1 | 4 | 3 | 1 | 2 | 4 |
| A: adhesive failure; CE: cohesive failure within enamel; CF: cohesive failure within FRC; M: mixed failure. | | | | | | | | |


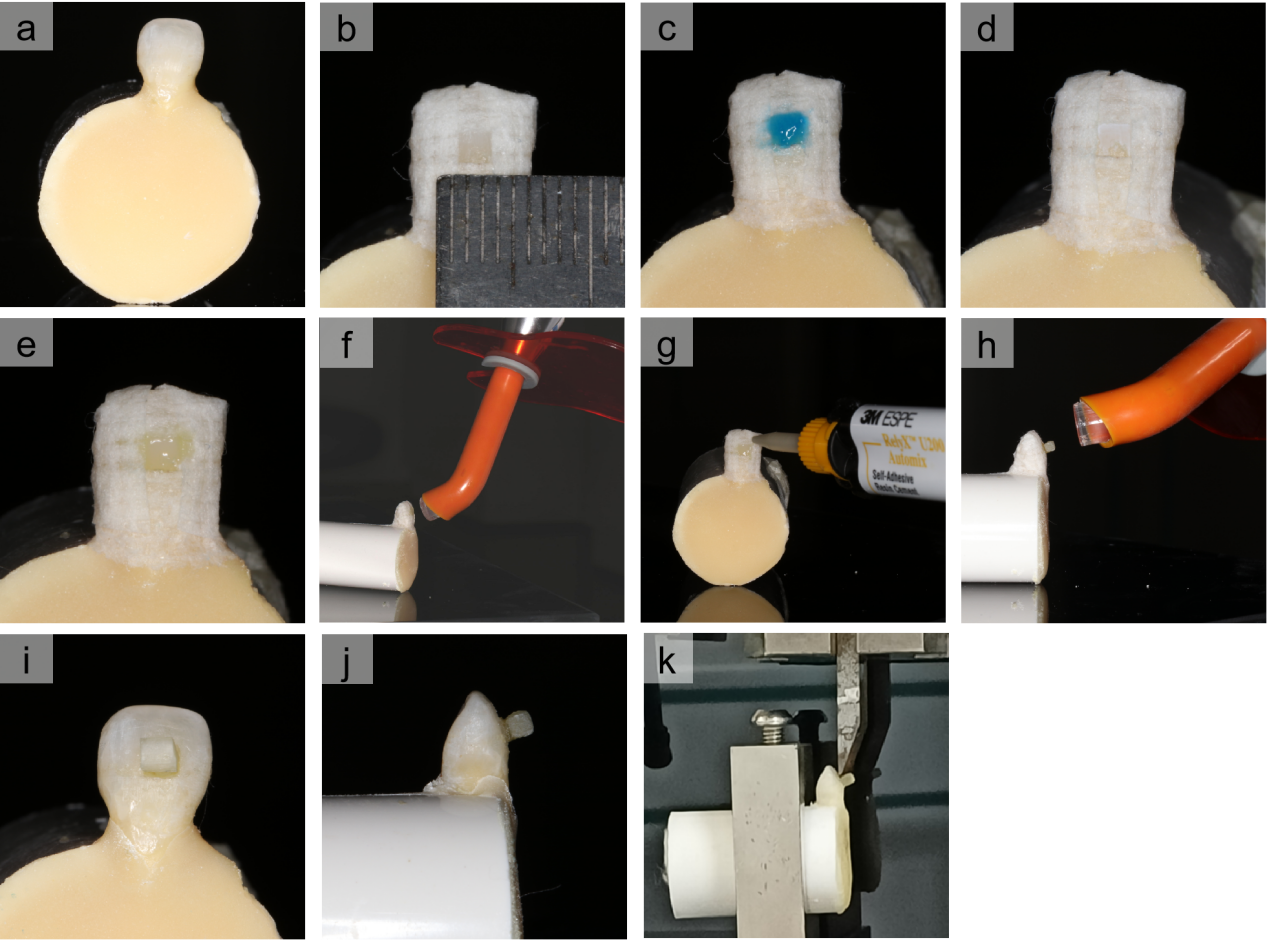


**Figure S1** a) select extracted sound human anterior tooth; b) use medical tape to isolate the standard bonding area; c) 37.5% phosphoric acid etching; d) white spot after acid etching; e) apply dental adhesive to the etched area; f) light cure; g) place the composite resin on the standardized bonding area; h) light cure; i) and j) are photographs of the standard specimen; k) schematic diagrams of shear bond strength test.

**
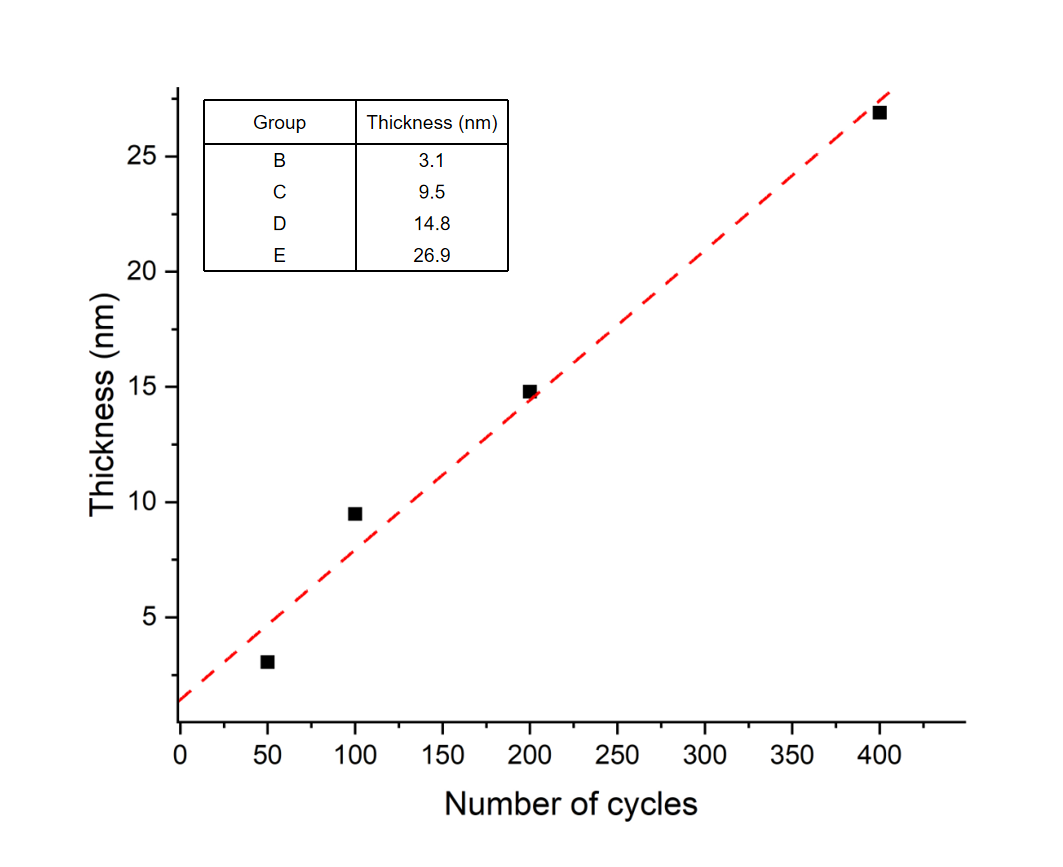
**

**Figure S2** Linear correlation between the thickness of SiO2 nanofilms and number of ALD cycles.
